# Supplementary material for: Anti-Proliferative and Pro-Apoptotic vLMW Fucoidan Formulas Decrease PD-L1 Surface Expression in EBV Latency III and DLBCL Tumoral B-Cells by Decreasing Actin Network
Source: MDPI journal article supplement (doi:10.3390/md21020132), 2023-02-18
Supplement: s1 [file s1]

# Anti-proliferative and pro-apoptotic vLMW fucoidan formulas decrease PD-L1 surface expression in EBV latency III and DLBCL tumoral B-cells by decreasing actin network

Jennifer Saliba <sup>1</sup>, Chanez Manseur <sup>2</sup>, Hugo Groult <sup>2</sup>, Hussein Akil <sup>1</sup>, Mona Tannoury <sup>3</sup>, Danielle Troutaud <sup>1</sup>, Thierry Maugard <sup>2</sup>, Jean Feuillard <sup>1,4</sup>, Ingrid Arnaudin <sup>2</sup> and Chantal Jayat-Vignoles <sup>1</sup>

<sup>1</sup> UMR CNRS 7276, INSERM 1262, Laboratoire CRIBL, Faculté de Médecine, Université de Limoges, France

<sup>2</sup> UMR CNRS 7266, Laboratoire LIENSs, Université de La Rochelle, France;

<sup>3</sup> Faculté des Sciences II, Université Libanaise, Liban

<sup>4</sup> Laboratoire d'Hématologie, CHU Dupuytren, 2 Avenue Martin Luther King, 87042 Limoges Cedex, France

\* Correspondence: [chantal.vignoles@unilim.fr](mailto:chantal.vignoles@unilim.fr); Tel.: 33 (0) 5 19 56 42 21; Fax: 33 (0) 5 55 43 58 97)

Table S1. Antibodies used for flow cytometry

PE: Phycoerythrin – APC: Allophycocyanin

| Specificity   | Clone   | Isotypic control | Clone   | Fluorochrome | Supplier  | Dilution |
|---------------|---------|------------------|---------|--------------|-----------|----------|
| CD19          | HIB19   | IgG1             | MOPC-21 | APC          | Biolegend | 1/10     |
| PD-L1 (CD274) | 29E.2A3 | IgG2b            | MPC-11  | PE           | Biolegend | 1/10     |

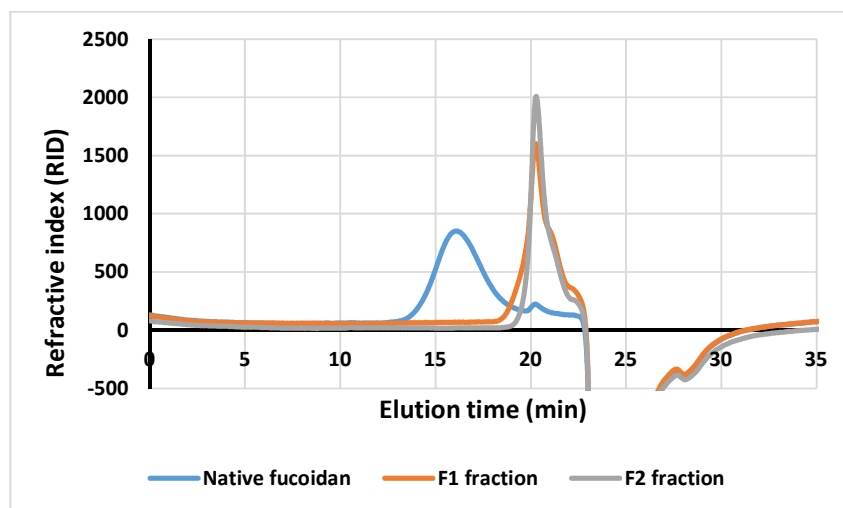

Figure S1. SEC-HPLC analysis with refractive detector of native fucoidan with F1 and F2 produced fractions

The SEC (size exclusion chromatography) separation was performed on a TSK-GEL G4000PW column in series with a TSK-GEL G3000PWXL at a flow rate of 0.8 mL/min using 0.1 M sodium nitrate (NaNO<sub>3</sub>) as the eluent.

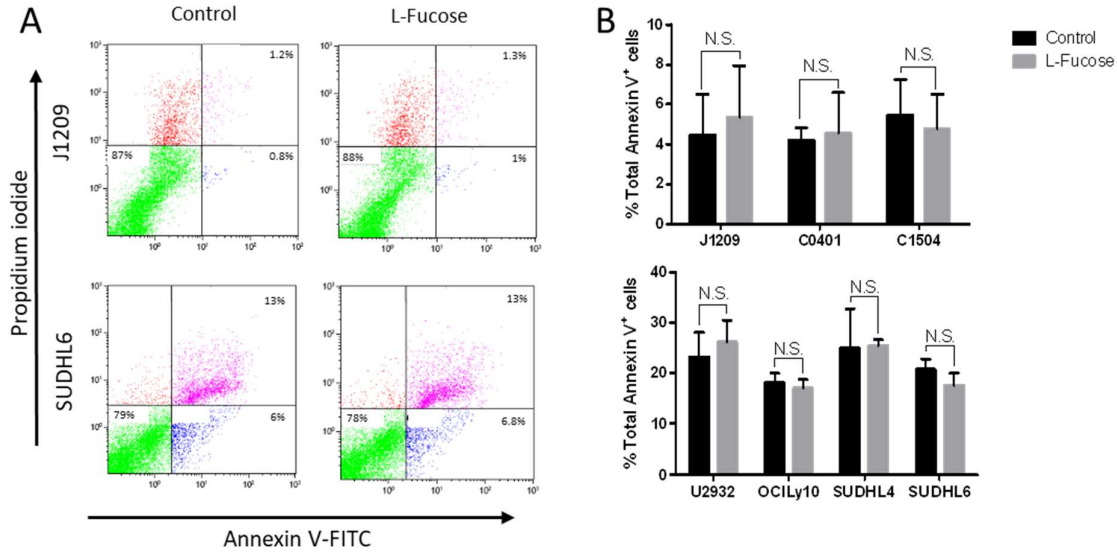

**Figure S2. L-fucose does not induce apoptosis in LCLs and DLBCLs**

LCLs (J1209, C0401, C1504) and DLBCLs (U2932, OCILy10, SUDHL4, SUDHL6) cells were treated or not (control) with 100µg/mL of L-fucose for 48h, followed by apoptosis analysis (Annexin V/PI staining) by flow cytometry. Results were obtained from three independent experiments.

(A) Examples of cell apoptosis for J1209 (LCL) and SUDHL6 (DLBCL) are shown (intact cells: green events – early apoptotic cells: blue events – late apoptotic cells: purple events). (B) Percentage of LCLs or DLBCLs total Annexin V<sup>+</sup> cells. L-fucose does not induce apoptosis in all cell lines.

NS: Not significant; \* p<0.05; \*\*p<0.01; \*\*\*p<0.001; \*\*\*\*p<0.0001.

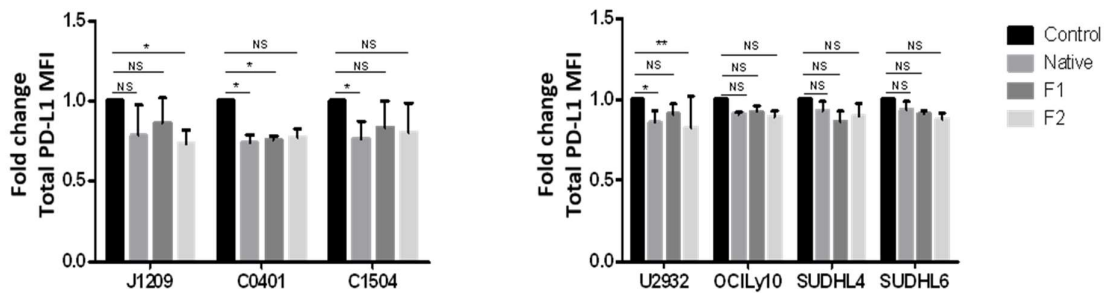

**Figure S3. Native fucoidan or vLMW-F do not (or slightly) change PD-L1 total expression**

LCLs (J1209, C0401, C1504) and DLBCLs (U2932, OCILy10, SUDHL4, SUDHL6) cells were treated or not (control) with 100µg/mL of native form or vLMW-F. Total (membrane and intracellular) expression of PD-L1 was assessed by flow cytometry and represented by the fold change (Ratio of MFI test/MFI control, both normalized to the isotypic control – MFI: Mean Fluorescence Intensity). No remarkable change was observed for PD-L1 total expression.

NS: Not significant; \* p<0.05; \*\*p<0.01; \*\*\*p<0.001; \*\*\*\*p<0.0001.

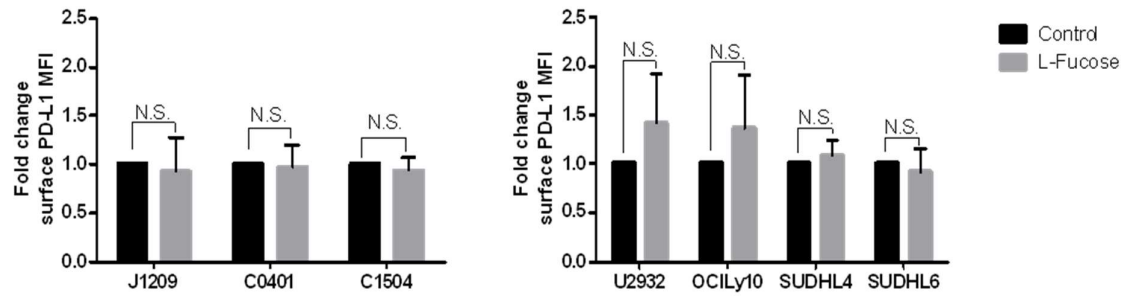

**Figure S4. L-fucose does not decrease PD-L1 surface expression in LCLs and DLBCLs cells**

LCLs (J1209, C0401, C1504) and DLBCLs (U2932, OCILy10, SUDHL4, SUDHL6) cells were treated with 100µg/mL of L-fucose for 48h, followed by immunofluorescent staining for PD-L1 analyzed by flow cytometry. Results were obtained from three independent experiments.

Fold change (Ratio of MFI test/MFI control, both normalized to the isotypic control – MFI: Mean Fluorescence Intensity) of PD-L1 surface expression for LCLs and DLBCLs was not decreased in the presence of L-fucose.

NS: Not significant; \*  $p < 0.05$ ; \*\*  $p < 0.01$ ; \*\*\*  $p < 0.001$ ; \*\*\*\*  $p < 0.0001$ .
